# Supplementary material for: Antagonism of STAT1 by Nipah virus P gene products modulates disease course but not lethal outcome in the ferret model
Source: PubMed Central journal article supplement (PMC6853903; doi:10.1038/s41598-019-53037-0), 2019-11-13
Supplement: 41598_2019_53037_MOESM1_ESM.pdf [file 41598_2019_53037_MOESM1_ESM.pdf]

## **TITLE**

Antagonism of STAT1 by Nipah virus P gene products modulates disease course but not lethal outcome in the ferret model

## **AUTHORS AND AFFILIATIONS**

Benjamin A. Satterfield<sup>1,2,3</sup>, Viktoriya Borisevich<sup>1,2</sup>, Stephanie L. Foster<sup>1,2</sup>, Sergio E. Rodriguez<sup>1,2</sup>, Robert W. Cross<sup>1,2</sup>, Karla A. Fenton<sup>1,2</sup>, Krystle N. Agans<sup>1,2</sup>, Christopher F. Basler<sup>4</sup>, Thomas W. Geisbert<sup>1,2</sup>, and Chad E. Mire<sup>1,2\*</sup>

<sup>1</sup> Galveston National Laboratory, University of Texas Medical Branch, Galveston, TX, USA

<sup>2</sup> Department of Microbiology and Immunology, University of Texas Medical Branch, Galveston, TX, USA

<sup>3</sup> Mayo Clinic, Department of Medicine, Rochester, MN, USA

<sup>4</sup> Center for Microbial Pathogenesis, Institute for Biomedical Sciences, Georgia State University, Atlanta, GA, USA

\*Corresponding Author: [chmire@utmb.edu](mailto:chmire@utmb.edu)

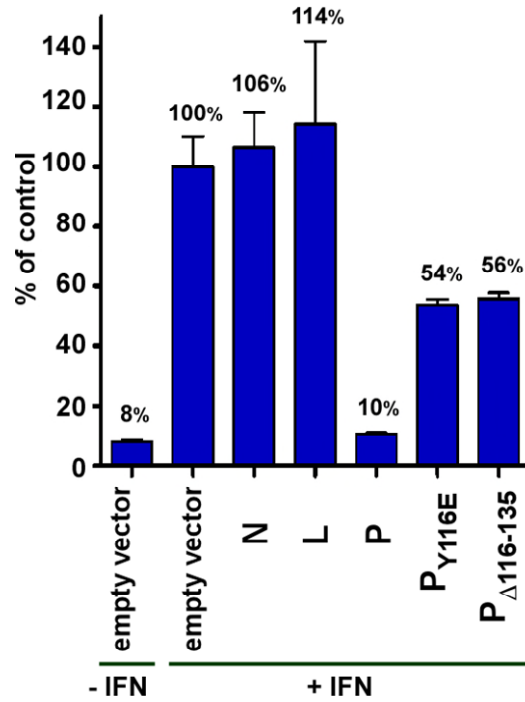

**Supplementary Figure 1. Luciferase expression with additional controls.** Relative IFN-induced luciferase expression of 293T cells transfected with vector only or various NiV<sub>M</sub> expression plasmids after pre-treatment with universal IFN- $\alpha$  or non-treated control as indicated. This is an adjunct to Figure 1b demonstrating that the presence of other NiV<sub>M</sub> proteins does not inhibit ISG signaling.

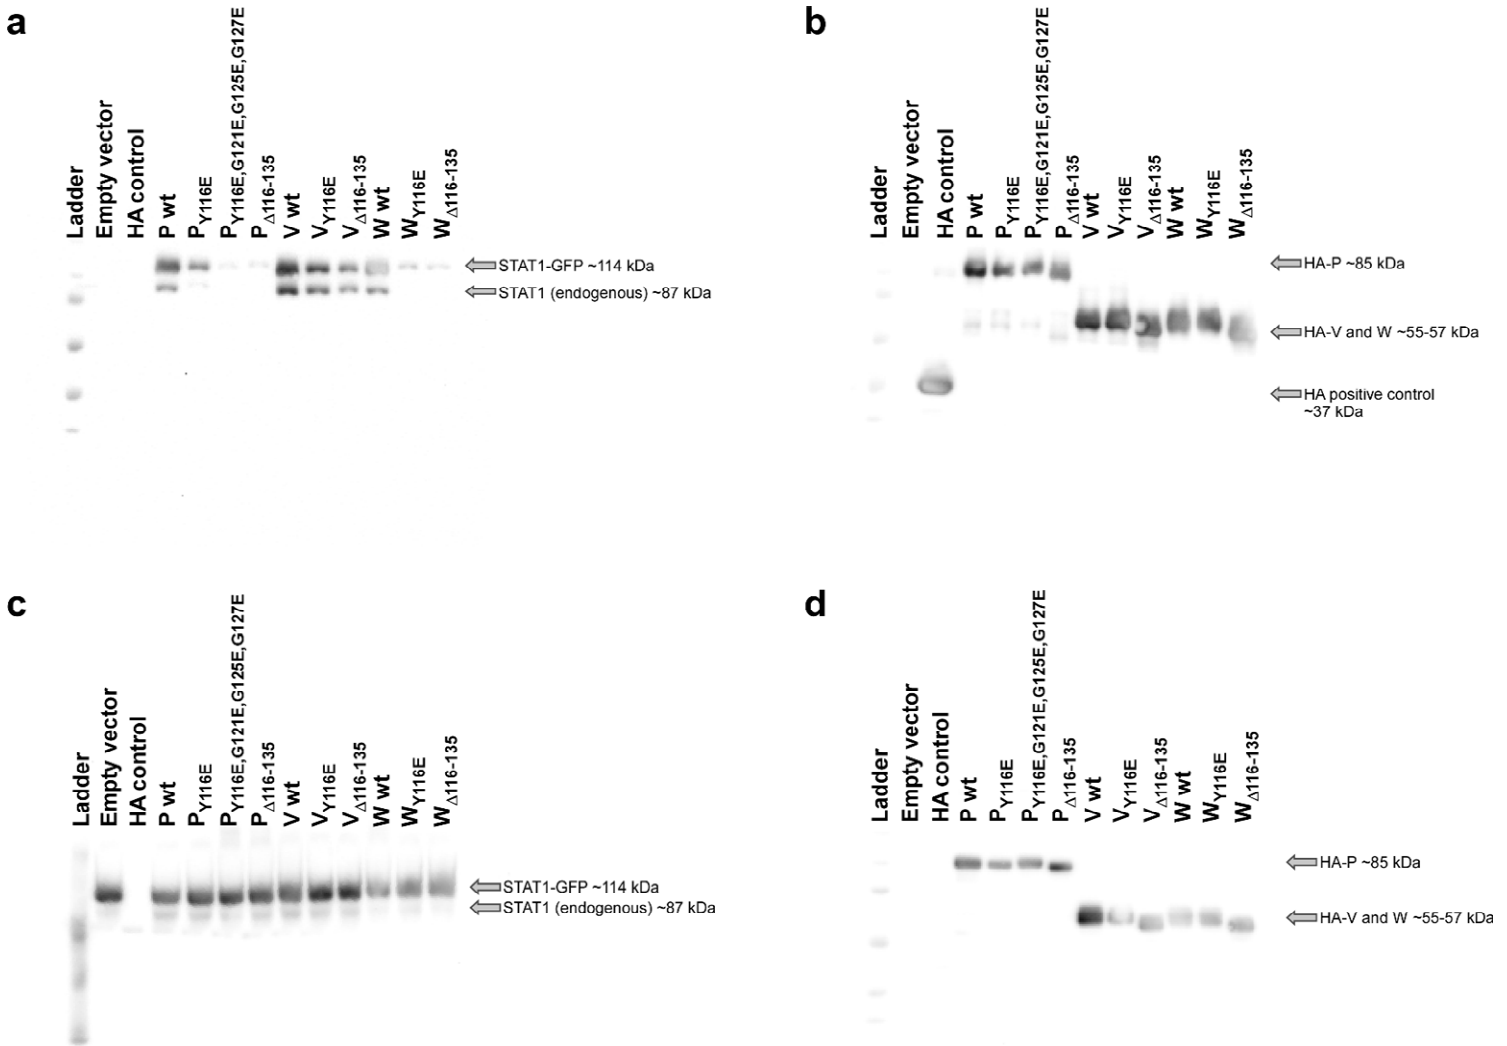

**Supplementary Figure 2. Full Western blots characterizing STAT1-binding mutations.** As detailed in Figure 2, 293T cells were transfected with pCAGGS-STAT1-GFP along with pCAGGS-HA NiV-P, -V, and -W wild-type and mutant proteins were then assessed at 24 hours post-transfection by Western blot, representative blots from three independent experiments are shown. Relative binding of P, V, and W mutants with STAT1 was assessed using co-immunoprecipitation with HA and stained with (a)  $\alpha$ -STAT1 or (b)  $\alpha$ -HA. Similarly, the total amount of expressed protein for P, V, and W mutants is observed in whole cell lysates stained with (c)  $\alpha$ -STAT1 or (d)  $\alpha$ -HA.

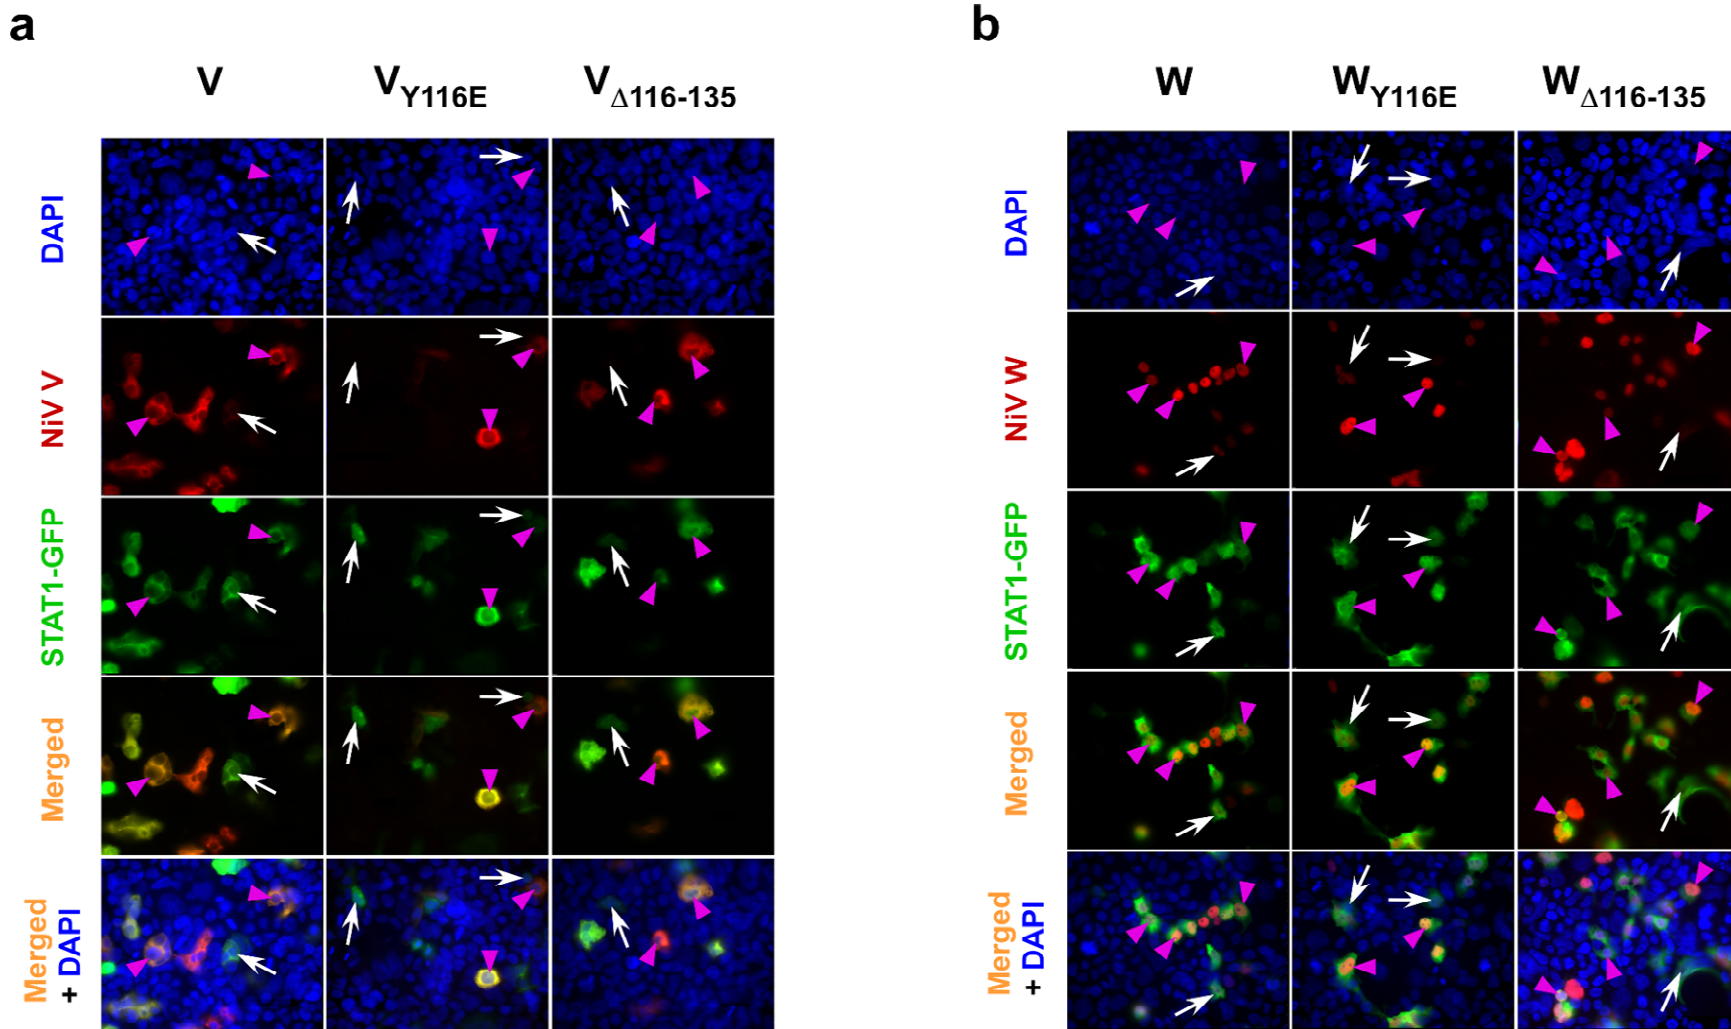

**Supplementary Figure 3. Immunofluorescence assay of NiV V, W, and STAT1 proteins in transfected 293T cells.** (a) Transfected cells were treated with universal IFN- $\alpha$  then fixed. Cell nuclei are stained with DAPI (blue); cells transfected with HA-tagged NiV V protein (red) show V protein in the cytoplasm but not the nucleus; cells transfected with fused STAT1-GFP show STAT1 in both the cytoplasm and the nucleus when V protein is not co-transfected (white arrows). Cells transfected with STAT1-GFP show no STAT1 present in the nuclei when co-transfected with wild-type NiV V (magenta arrowhead; first column panels) but STAT1 is present when co-transfected with NiV V protein containing the V<sub>Y116E</sub> mutation (magenta arrowhead; second column panels) or V<sub>Δ116-135</sub> deletion (magenta arrowhead; third column panels) indicating the ability of these mutations to ablate the ability of NiV V to sequester STAT1. (b) Transfected cells were treated with universal IFN- $\alpha$  then fixed. Cell nuclei are stained with DAPI (blue); cells transfected with HA-tagged NiV W protein (red) show W protein in the nucleus; cells transfected with fused STAT1-GFP show STAT1 in both the cytoplasm and the nucleus when W protein is not co-transfected (white arrows). Cells transfected with STAT1-GFP show STAT1 present in the nuclei when co-transfected with wild-type NiV W (magenta arrowhead; first column panels) and W protein containing the W<sub>Y116E</sub> mutation (magenta arrowhead; second column panels) or W<sub>Δ116-135</sub> deletion (magenta arrowhead; third column panels) demonstrating the known ability of W protein to sequester STAT1 in the nucleus. Images taken: 20x.

**a**

| NiV <sub>M</sub> Genome Nucleotide Position | P ORF Amino Acid Position | C ORF Amino Acid Position |
|---------------------------------------------|---------------------------|---------------------------|
| T2751A and C2753G                           | Y116E                     | Y108Stop and T109S        |
| G2767A                                      | G121E                     | E114K                     |
| G2779A                                      | G125E                     | D118R                     |
| G2785A                                      | G127E                     | D120R                     |
| T2793G and A2795C                           | S130A                     | L122L and Q123P           |
| A2796G and G2797C                           | S131A                     | Q123Q and A124P           |
| G2809A and G2810A                           | G135E                     | G128R                     |
| Δ2766-2795                                  | Δ121-130                  | Δ114-123                  |
| Δ2751-2810                                  | Δ116-135                  | Δ109-128                  |

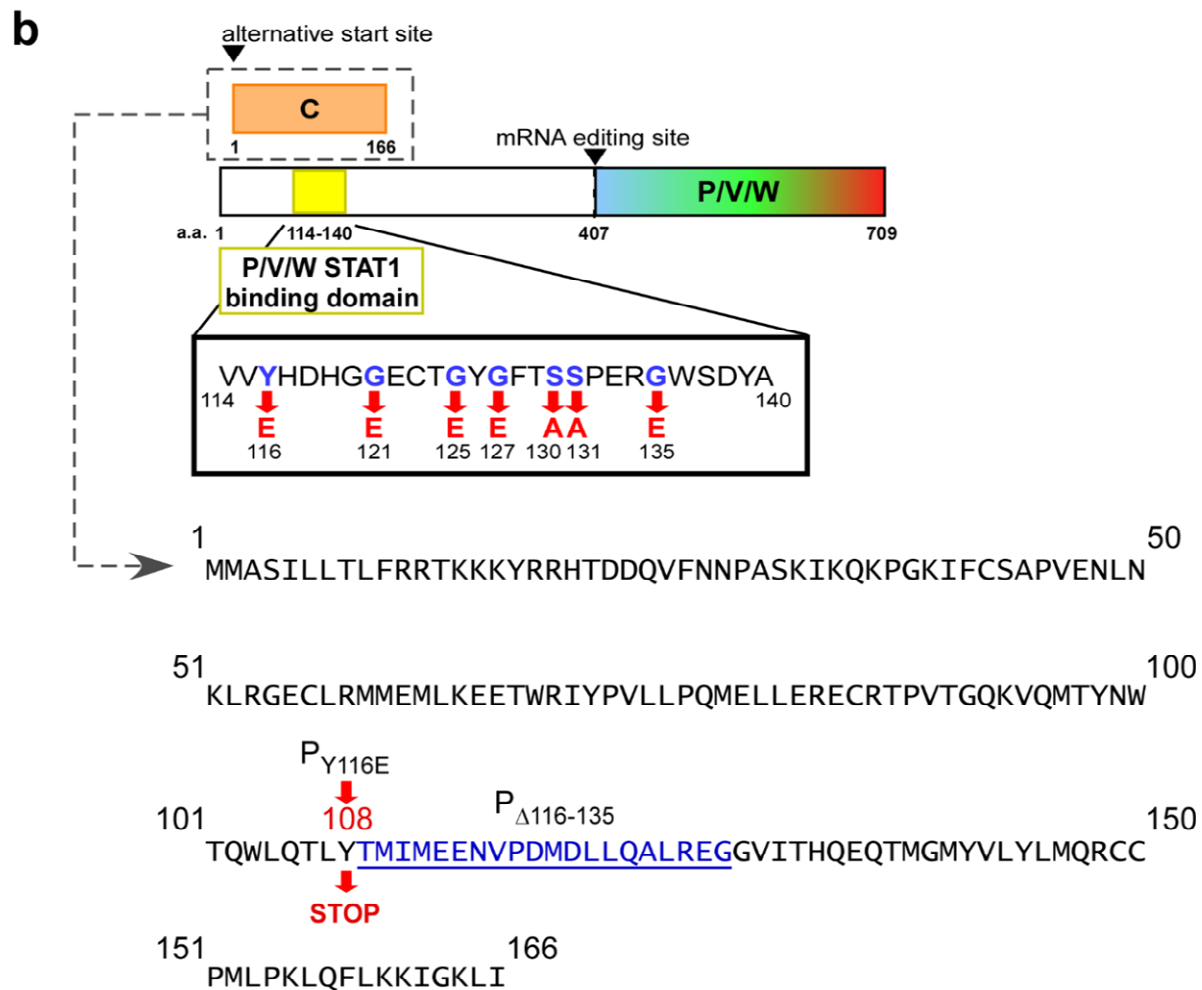

**Supplementary Figure 4. STAT1<sup>blind</sup> mutations utilized in this study.** (a) The nucleotide positions and the subsequent amino acid mutations in the P and C ORFs are shown. The original nucleotide/amino acid is shown in blue, the mutated nucleotide/amino acid is shown in green. STOP codon is shown in red. Silent mutations remain in blue. (b) The overlap of the P and C ORFs are shown in the upper panel, the amino acid sequence of the C protein is shown below. The position of the P<sub>Y116E</sub> and P<sub>Δ116-135</sub> mutations are shown.

| Score           | Expect | Method                                                        | Identities   | Positives    | Gaps      |
|-----------------|--------|---------------------------------------------------------------|--------------|--------------|-----------|
| 1506 bits(3899) | 0.0    | Compositional matrix adjust.                                  | 727/750(97%) | 738/750(98%) | 0/750(0%) |
| Query 1         |        | MSQWYELQQLDKSFLEQVHQLYDDSFPMIEIRQYLAQWLEKQDWEHAANDVSFATIRFHDL |              |              | 60        |
| Sbjct 1         |        | MSQWYELQQLDKSFLEQVHQLYDDSFPMIEIRQYLAQWLEKQDWEHAANDVSFATIRFHDL |              |              | 60        |
| Query 61        |        | LSQLDDQYSRFSLENNFLLQHNIRKSKRNLQDNFQEDPIQMSMIIYSCLKEERKILENAQ  |              |              | 120       |
| Sbjct 61        |        | LSQLDDQYSRFSLENNFLLQHNIRKSKRNLQDNFQEDP+QMSMII +CLKEER+ILENAQ  |              |              | 120       |
| Query 121       |        | RFNQAQSGNIQSTVMLDKQKELDSKVRNVKDKVMCIEHEIKSLEDLQDEYDFKCKTLQNR  |              |              | 180       |
| Sbjct 121       |        | RFNQAQSGSIQSTVMLDKQKELDSKVRNVKDKVMCIEHEIKTLEDLQDEYDFKCKTLQNR  |              |              | 180       |
| Query 181       |        | EHETNGVAKSDQKQEQLLLKMYLMLDNKRKEVVKIIELLNVTELTQNALINDELVEWK    |              |              | 240       |
| Sbjct 181       |        | EHETNGVAKNDQKQEQLLIQKMYLMLDNKRKEVVKIIELLNVTELTQKALINDELVEWK   |              |              | 240       |
| Query 241       |        | RRQQSACIGGPPNACLQDQVWFIVAESLQQVRQQLKKLEELEQKYTYEHDPITKNKQV    |              |              | 300       |
| Sbjct 241       |        | RRQQSACIGGPPNACLQDQVWFIVAESLQQVRQQLKKLEELEQKYTYEHDPITKNKQG    |              |              | 300       |
| Query 301       |        | LWDRFSLFQQLIQSSFVVERQPCMPHPQRPLVLTGVQFTVKLRLLVVKLQELNLYNLKV   |              |              | 360       |
| Sbjct 301       |        | LWDRFSLFQQLIQSSFVVERQPCMPHPQRPLVLTGVQFTVKLRLLVVKLQELNLYNLKV   |              |              | 360       |
| Query 361       |        | KVLFDKDVNERNTVKGFRKFNILGHTHTKVMNMEESTNGSLAAEFRHLQLKEQKNAGTRTN |              |              | 420       |
| Sbjct 361       |        | KVLFDKDVNERNTVKGFRKFNILGHTHTKVMNMEESTNGSLAAEFRHLQLKEQKNAGTRTN |              |              | 420       |
| Query 421       |        | EGPLIVTEELHSLSFETQLCQPGGLVIDLETTSLPVVVISNVSQPSGWASILWYNMLVAE  |              |              | 480       |
| Sbjct 421       |        | EGPLIVTEELHSLSFETQLCQPGGLVIDLETTSLPVVVISNVSQPSGWASILWYNMLVTE  |              |              | 480       |
| Query 481       |        | PRNLSFFLTPPCARWAQLSEVLSWQFSSVTKRGLNVDQLNMLGEKLLGPNASPDGLIPWT  |              |              | 540       |
| Sbjct 481       |        | PRNLSFFLTPPCARWAQLSEVLSWQFSSVTKRGLNVDQLNMLGEKLLGPNASPDGLIPWT  |              |              | 540       |
| Sbjct 541       |        | RFCKENINDKNFPFWLWIESILELIKHHLLSLWNDGCIVGFISKERERALLKDQQPGTFL  |              |              | 600       |
| Query 601       |        | LRFSESSREGAITFTWVERSQNGGEPDFHAVEPYTKKELSAVTFPDIIRNYKVMMAENIP  |              |              | 660       |
| Sbjct 601       |        | LRFSESREGAITFTWVERPQNGGEPDFHAVEPYTKKELSAVTFPDIIRNYKVMMAENIP   |              |              | 660       |
| Query 661       |        | ENPLKYLYPNIDKDHAFGKYYSRPKEAPEPEMELDGPKGTYIKTELISVSEVHPSRLQTT  |              |              | 720       |
| Sbjct 661       |        | ENPLKYLYPNIDKDHAFGKYYSRPKEAPEPEMELDGPKGTYIKTELISVSEVHPSRLQTT  |              |              | 720       |
| Query 721       |        | DNLLPMSPEEFDEVSRIVGSVEFDSMMNTV                                | 750          |              |           |
| Sbjct 721       |        | DNLLPMSPEEFDEVSRIVGSVEFDSMMNAV                                | 750          |              |           |

**Supplementary Figure 5. Amino acid identity of STAT1 from humans and ferrets.** Amino acid sequences of the STAT1 gene from humans (accession number NP\_009330.1), listed as “Query,” and ferrets (accession number XP\_012917318.1), listed as “Sbjct,” were compared using NCBI’s BLASTp software and found to have 97% amino acid identity.

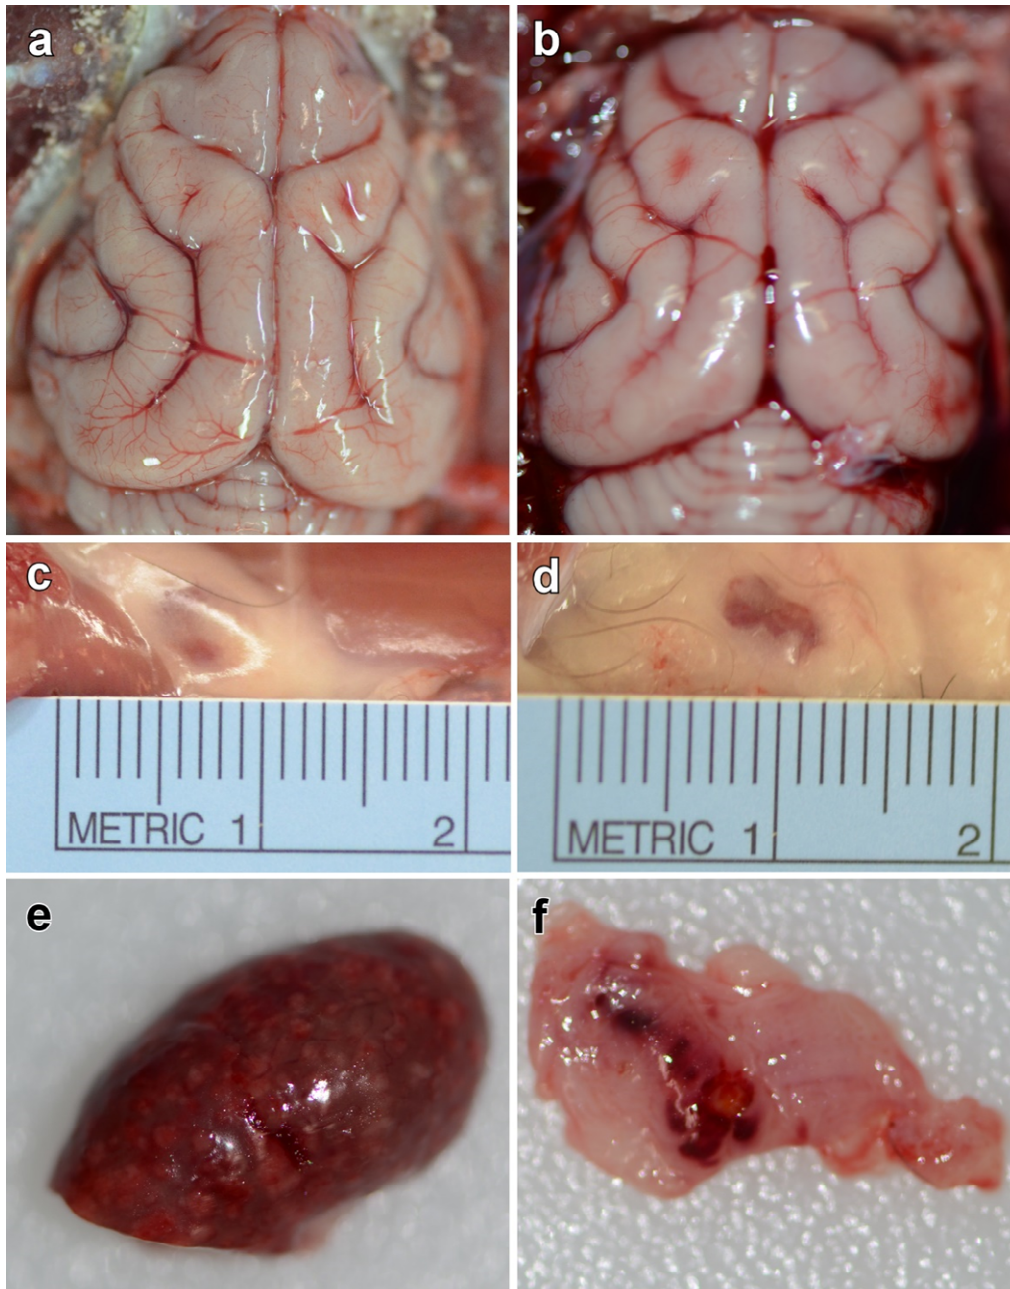

**Supplementary Figure 6. Gross pathology of brain, lymph nodes, kidney, and bladder.** Representative brains from ferrets infected with rNiV<sub>M</sub>-P<sub>Y116E</sub> (a) or rNiV<sub>M</sub>-P<sub>Δ116-135</sub> (b) both show severe congestion of the blood vessels surrounding the brain. Enlarged lymph nodes from the axial (c) and inguinal (d) regions of a ferret infected with rNiV<sub>M</sub>-P<sub>Y116E</sub>. Necrosis and hemorrhage of the kidney was seen in most ferrets from all three cohorts (e). Mucosal hemorrhagic lesions of the urinary bladder were seen in some ferrets from all three cohorts (f).

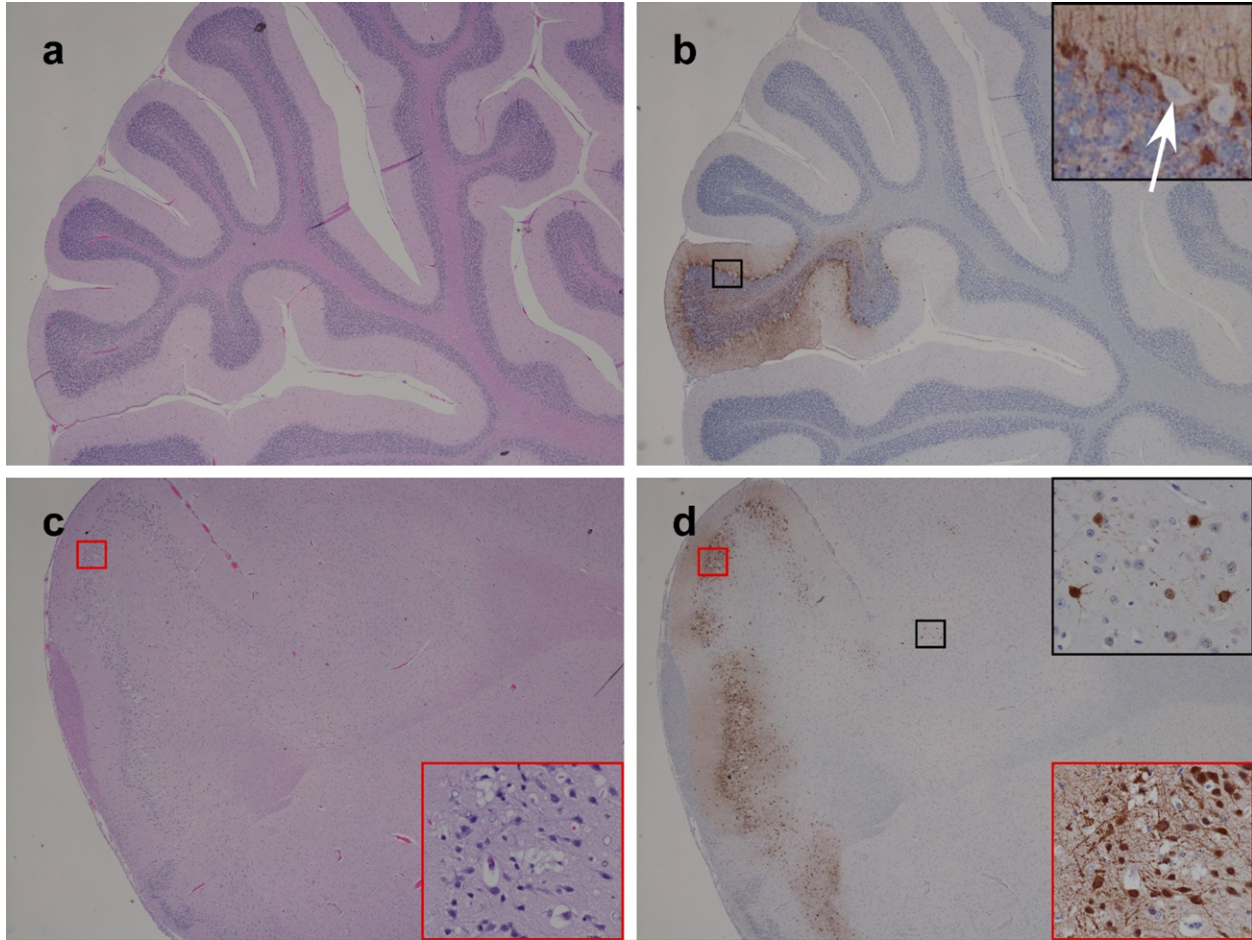

**Supplementary Figure 7. H&E and immunohistochemistry of ferret brains.** H&E (a, c) and immunohistochemistry labeled with a NiV N protein-specific polyclonal rabbit antibody (b, d) of the cerebellum of ferret rNiV<sub>M</sub>-P<sub>Y116E</sub>-05 (a, b) and frontal cortex of ferret rNiV<sub>M</sub>-P<sub>Y116E</sub>-02 (c, d). Insert in panel b shows infected neurons with Purkinje cell sparing. Red inserts in panels c and d show marked locally extensive, vacuolar plaque with necrosis and gliosis within the grey matter in regions with diffuse, strongly immunopositive neuronal involvement. No vacuolar plaque is observed without associated NiV antigen. Black insert in panel d shows scattered deep neuron infection. Images taken: brain 2x.



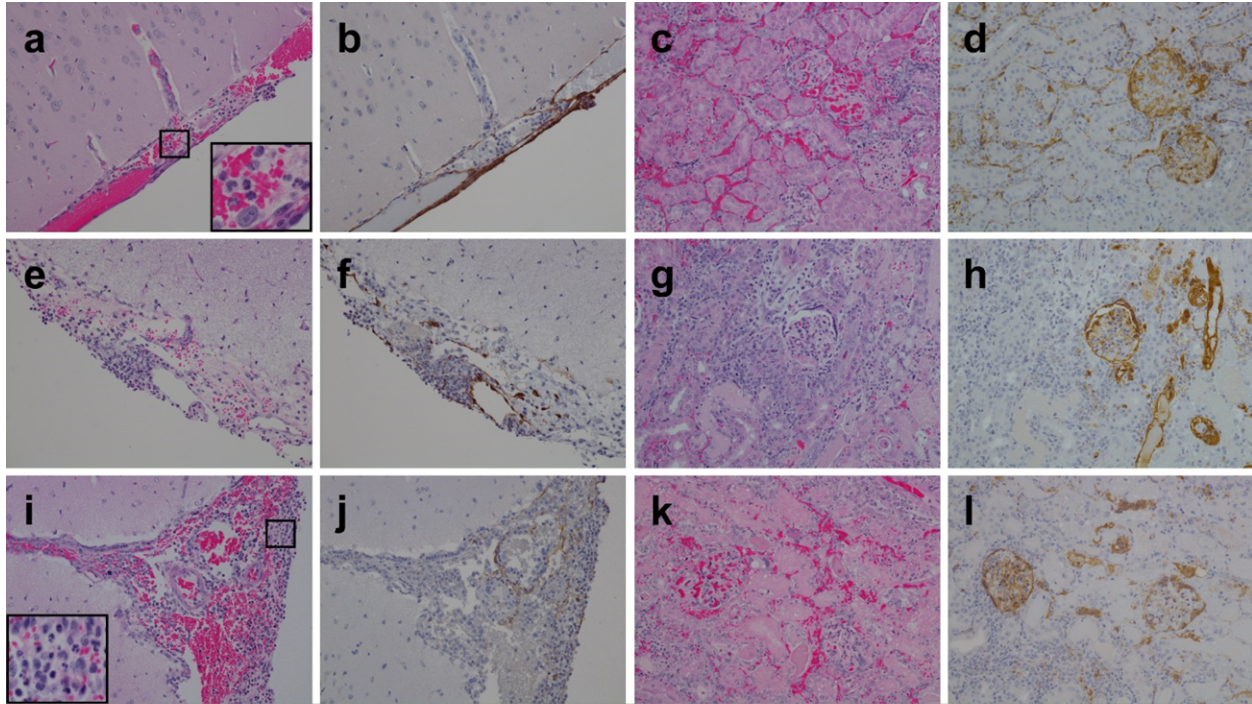

**Supplementary Figure 8. H&E and immunohistochemistry of ferret brain meninges.** Representative H&E (**a,e,i**) and immunohistochemistry labeled with a NiV N protein-specific polyclonal rabbit antibody (**b,f,j**) of the meninges around the brain from representative ferrets infected with rNiV<sub>M</sub>-wt (**a,b**), rNiV<sub>M</sub>-P<sub>Y116E</sub> (**e,f**), and rNiV<sub>M</sub>-P<sub>Δ116-135</sub> (**i,j**). Inserts show mononuclear cell and polynuclear cell infiltration. Representative H&E (**c,g,k**) and immunohistochemistry labeled with a NiV N protein-specific polyclonal rabbit antibody (**d,h,l**) of renal glomeruli of the kidneys from representative ferrets infected with rNiV<sub>M</sub>-wt (**c,d**), rNiV<sub>M</sub>-P<sub>Y116E</sub> (**g,h**), and rNiV<sub>M</sub>-P<sub>Δ116-135</sub> (**k,l**). Images taken: brain 20x, kidney 20x.

**Supplementary Table 1. Pathology score comparison of selected organs for all published rNiV<sub>M</sub> cohorts\***

| Ferret cohort                                      | Reference | Liver              |                  |     | Spleen             |                  |     | Lung               |                  |      |         | Brain              |                  |     |
|----------------------------------------------------|-----------|--------------------|------------------|-----|--------------------|------------------|-----|--------------------|------------------|------|---------|--------------------|------------------|-----|
|                                                    |           | Gross <sup>a</sup> | H&E <sup>b</sup> | IHC | Gross <sup>c</sup> | H&E <sup>d</sup> | IHC | Gross <sup>e</sup> | H&E <sup>f</sup> | IHC  | Nodules | Gross <sup>g</sup> | H&E <sup>h</sup> | IHC |
| rNiV <sub>M</sub> -wt                              | §         | 3                  | 3                | 3   | 4                  | 4                | 3   | 3                  | 2                | 2    | 2       | 1                  | 1                | 2   |
| rNiV <sub>M</sub> -V <sup>ko</sup>                 | 20        | 0                  | 0                | 0   | 0                  | 0                | 0   | 0                  | 0                | 0    | 0       | 0                  | 0                | 0   |
| rNiV <sub>M</sub> -W <sup>ko</sup>                 | 20        | 1.5                | 2.5              | 2.5 | 4                  | 3                | 3   | 1.5                | 3                | 3    | 3       | 1                  | 1                | 2   |
| rNiV <sub>M</sub> -C <sup>ko</sup>                 | 21        | 1.5                | 3                | 3   | 3                  | 3†               | 3   | 2                  | 1.5              | 2‡   | 1.5     | 1                  | 0                | 1   |
| rNiV <sub>M</sub> -C <sup>ko</sup> W <sup>ko</sup> | 21        | 1                  | 1                | 0   | 3                  | 2†               | 1   | 1                  | 1                | 0.5‡ | 1       | 1                  | 1                | 1   |
| rNiV <sub>M</sub> -P <sub>Y116E</sub>              | §         | 3                  | 3                | 3   | 4                  | 3.5              | 3   | 2                  | 2                | 2    | 2       | 1.5                | 2□               | 2□  |
| rNiV <sub>M</sub> -P <sub>Δ116-135</sub>           | §         | 1.5                | 2                | 2   | 3                  | 2.5†             | 1.5 | 2                  | 2.5              | 1.5‡ | 2.5     | 1.5                | 1.5              | 2.5 |

**Pathology scoring: scale of 0 – 5; 0 = no lesion; 5 = severe lesions; scores are averaged from all animals in each cohort**

\* All specimens were reviewed and scored by the same board certified veterinary pathologist for consistency

<sup>a</sup> Reticulation and multifocal pale areas of necrosis

<sup>b</sup> Hepatocellular necrosis, vacuolar change, congestion, sinusoidal leukocytosis, and periportal lymphoplasmacytic infiltrates

<sup>c</sup> Splenomegaly, mottled surface indicating multifocal necrosis

<sup>d</sup> Splenic architectural destruction, germinal center obliteration, and necrosis

<sup>e</sup> Multifocal pinpoint and/or coalescing hemorrhage

<sup>f</sup> Interstitial pneumonia, necrosis of the alveolar septae, syncytial cell formation, edema, and hemorrhage

<sup>g</sup> Congestion of meningeal blood vessels and blood pooling/clots

<sup>h</sup> Meningitis

† Indicates hypercellularity of the red pulp

‡ Indicates immunolabeling predominately associated with inflammatory nodules

□ Indicates that there was great variability among animals, some scoring much higher, others much lower

§ Current study
